# Supplementary material for: Sunlight-Exposed Biofilm Microbial Communities Are Naturally Resistant to Chernobyl Ionizing-Radiation Levels
Source: PubMed Central journal article supplement (PMC3135598; doi:10.1371/journal.pone.0021764), 2011-07-13
Supplement: pone.0021764.s002.pdf [file pone.0021764.s002.pdf]

**Table S1.** Regression and interaction coefficients estimated using the model described in the Methods section.

**Intercept**      3,091

**16S**              0,041

|                | <b>Cher-2</b> | <b>Cher-6</b> | <b>Cher-8</b> |
|----------------|---------------|---------------|---------------|
| <b>Pop</b>     | -0,188        | 0,691         | -0,504        |
| <b>16SxPop</b> | 0,035         | -0,076        | 0,041         |

|                | <b>Ref-127</b> | <b>Ref-128</b> | <b>Ref-2</b> |
|----------------|----------------|----------------|--------------|
| <b>Ref</b>     | -0,061         | -0,139         | 0,201        |
| <b>16SxRef</b> | 0,008          | -0,014         | 0,006        |

|                | <b>Cher-2</b> | <b>Cher-6</b> | <b>Cher-8</b> |
|----------------|---------------|---------------|---------------|
| <b>Ref-127</b> | 0,046         | -0,077        | 0,03          |
| <b>Ref-128</b> | -0,151        | 0,052         | 0,099         |
| <b>Ref-2</b>   | 0,105         | 0,025         | -0,129        |
